# Supplementary material for: Research Needs and Pathways to Advance Hydrothermal Carbonization Technology
Source: MDPI journal article supplement (doi:10.3390/agronomy14020247), 2024-01-24
Supplement: s1 [file s1]

Archive with 1 entries (1 files):
- agronomy-2828067-supplementary.pdf
