# Supplementary material for: Research Needs and Pathways to Advance Hydrothermal Carbonization Technology
Source: MDPI journal article supplement (doi:10.3390/agronomy14020247), 2024-01-24
Supplement: s1 [file s1 › agronomy-2828067-supplementary.pdf]

## Supplementary material

Review

## Research needs and pathways to advance HTC technology

Chau Huyen Dang <sup>1,2,\*</sup>, Giovanna Cappai <sup>3,4</sup>, JaeWook Chung <sup>5,6</sup>, Changyoon Jeong <sup>5</sup>, Beatrice Kulli <sup>6</sup>, Filippo Marchelli <sup>7</sup>, Kyoung S Ro <sup>8</sup> and Silvia Román <sup>9,\*</sup>

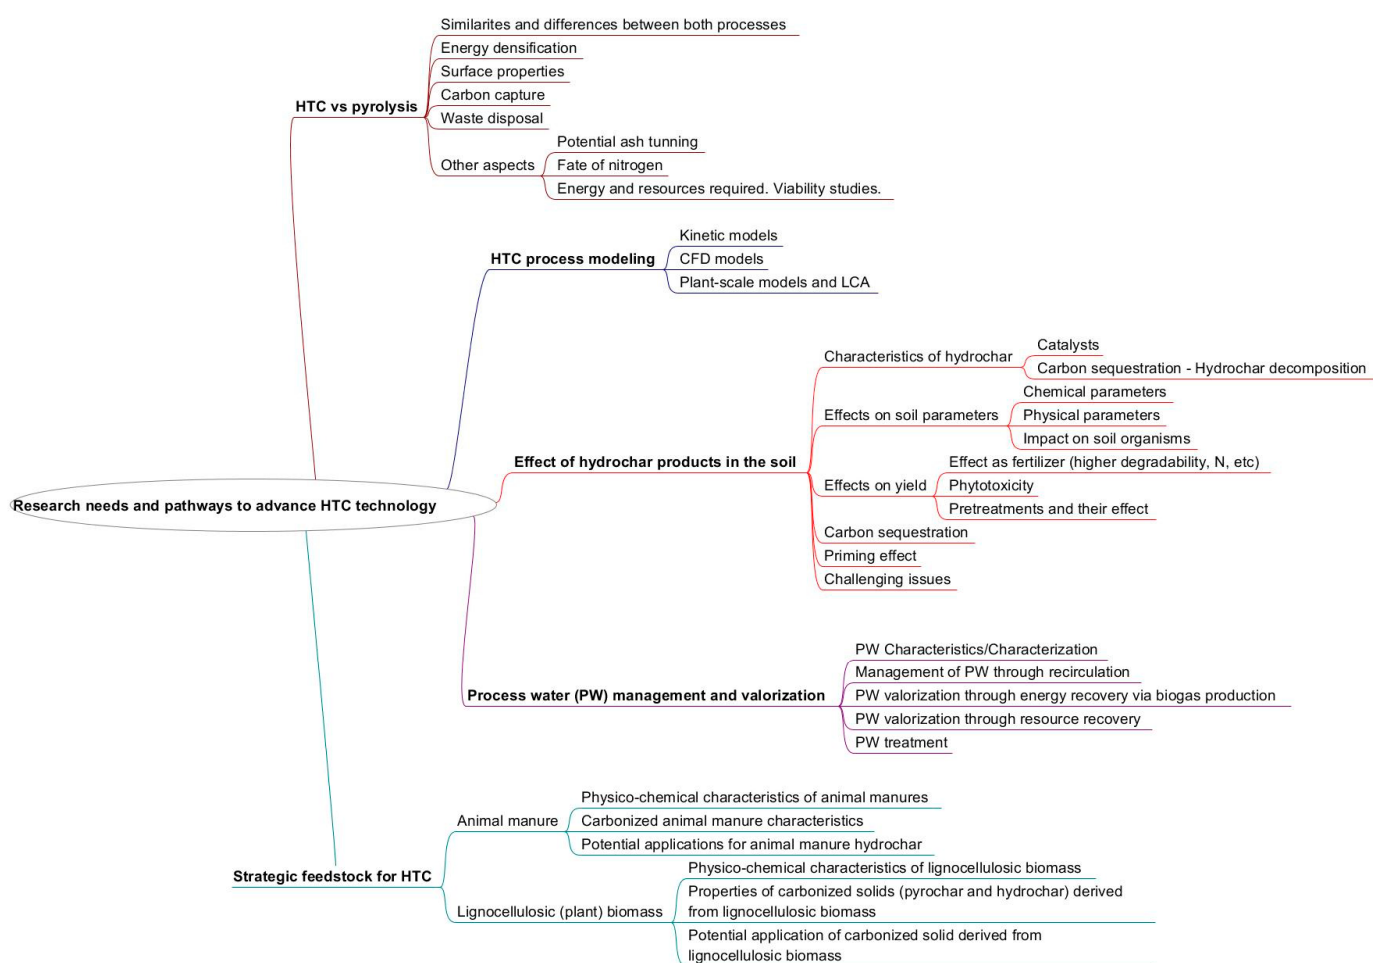

**Figure S1.** HTC research needs and actions, as identified from OCDE Workshop ("Innovative Hydrothermal Systems to Valorize Agricultural Residuals: Roadmap towards implementation - achievements and barriers").
